# Supplementary material for: Meltwater, mud, and the Mississippi: Upper Mississippi River Valley slackwater sediments reveal shifting deglacial meltwater sources associated with the Marquette Readvance of the Laurentide Ice Sheet
Source: Copernicus journal article supplement (doi:10.5194/egusphere-2025-3920), 2025-09-19
Supplement: Supplementary file 1 [file egusphere-2025-3920-supplement.pdf]

**Supplement: “Meltwater, mud, and the Mississippi: Upper Mississippi River Valley slackwater sediments reveal shifting deglacial meltwater sources associated with the Marquette Readvance of the Laurentide Ice Sheet”**

**Equivalent dose ( $D_E$ ) Distributions: Probability density function, radial plot, overdispersion (OD)**

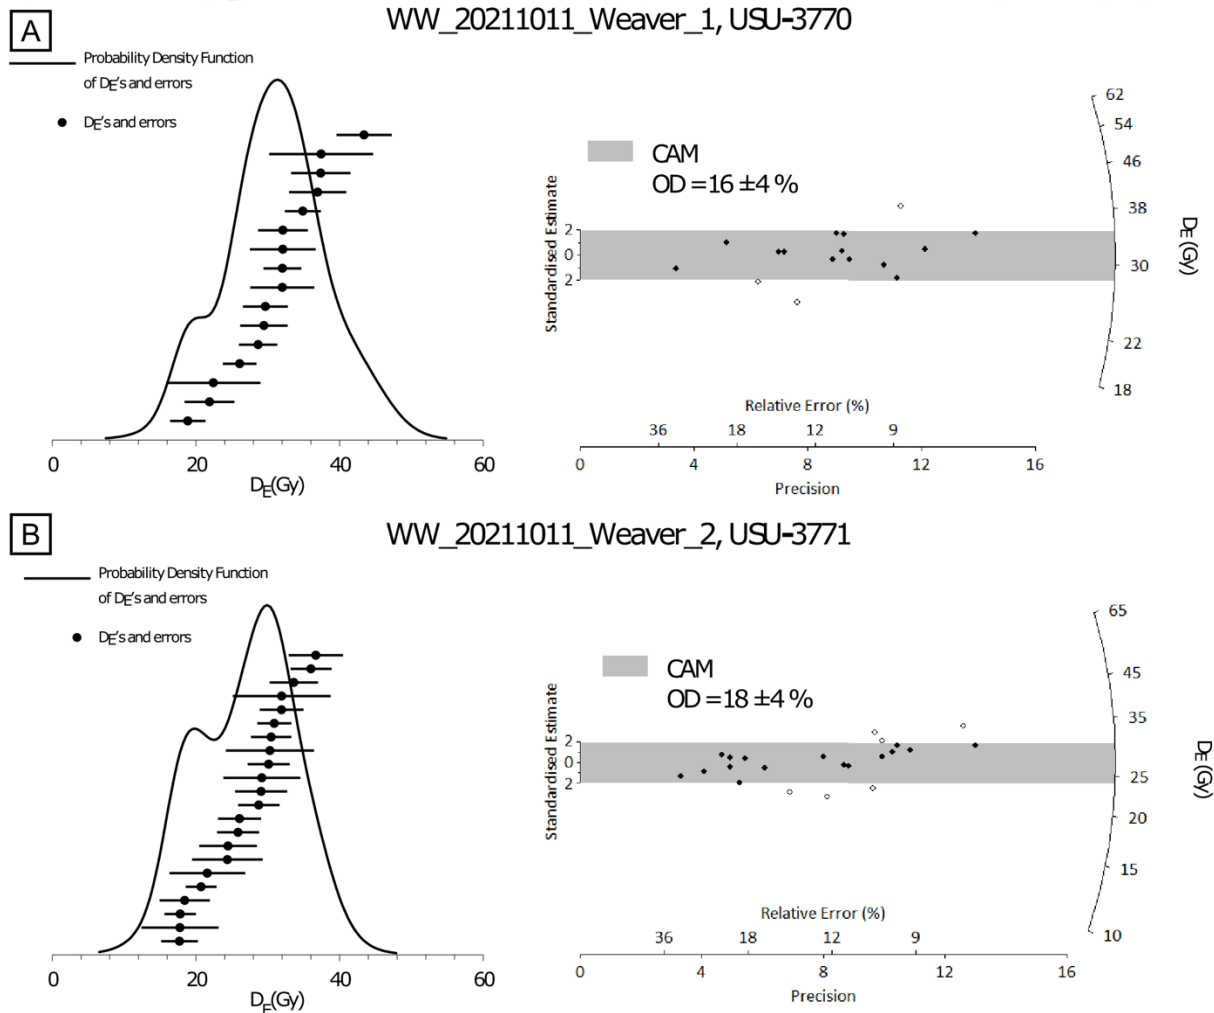

**Figure S1. Equivalent dose ( $D_E$ ) Distributions for optically stimulated luminescence (OSL) samples: Probability density function, radial plot, overdispersion (OD). A) WW\_20211011\_Weaver\_1 is the shallower ~1.5 m depth OSL sample and B) WW\_20211011\_Weaver\_2 is the deeper ~2.5 m depth OSL sample.**

**Supplement:** *“Meltwater, mud, and the Mississippi: Upper Mississippi River Valley slackwater sediments reveal shifting deglacial meltwater sources associated with the Marquette Readvance of the Laurentide Ice Sheet”*

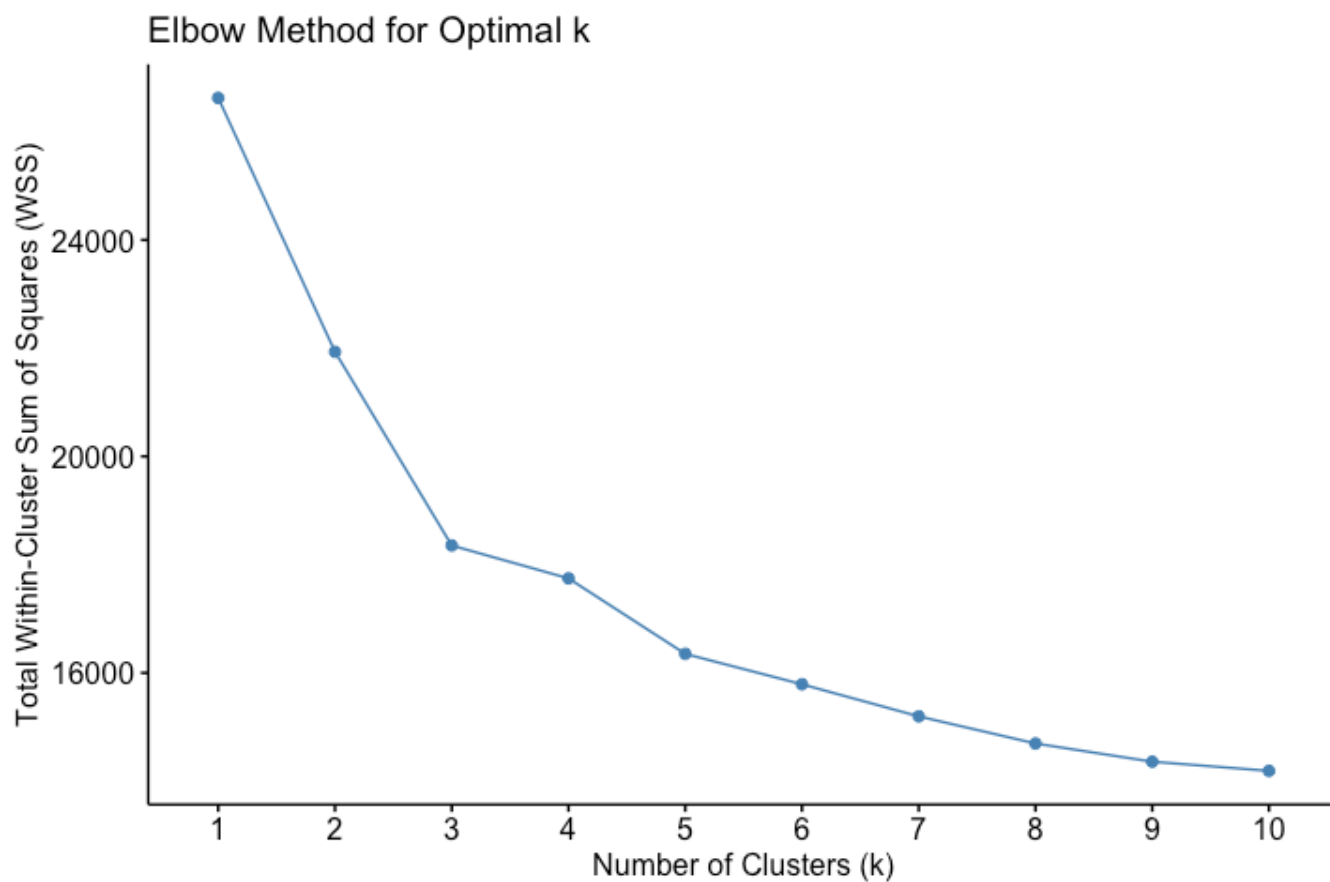

Figure S2. Elbow method output from principal component analysis used to determine the appropriate number of groupings (k) for k-means clustering. Using this output, we determined k=3 to be the optimal number of clusters going forward with analysis.
